# Supplementary material
Source: PubMed Central journal article supplement (PMC4440849)
Supplement: NIHMS592366-supplement-Supp_FigureS1-S4.pdf [file NIHMS592366-supplement-Supp_FigureS1-S4.pdf]

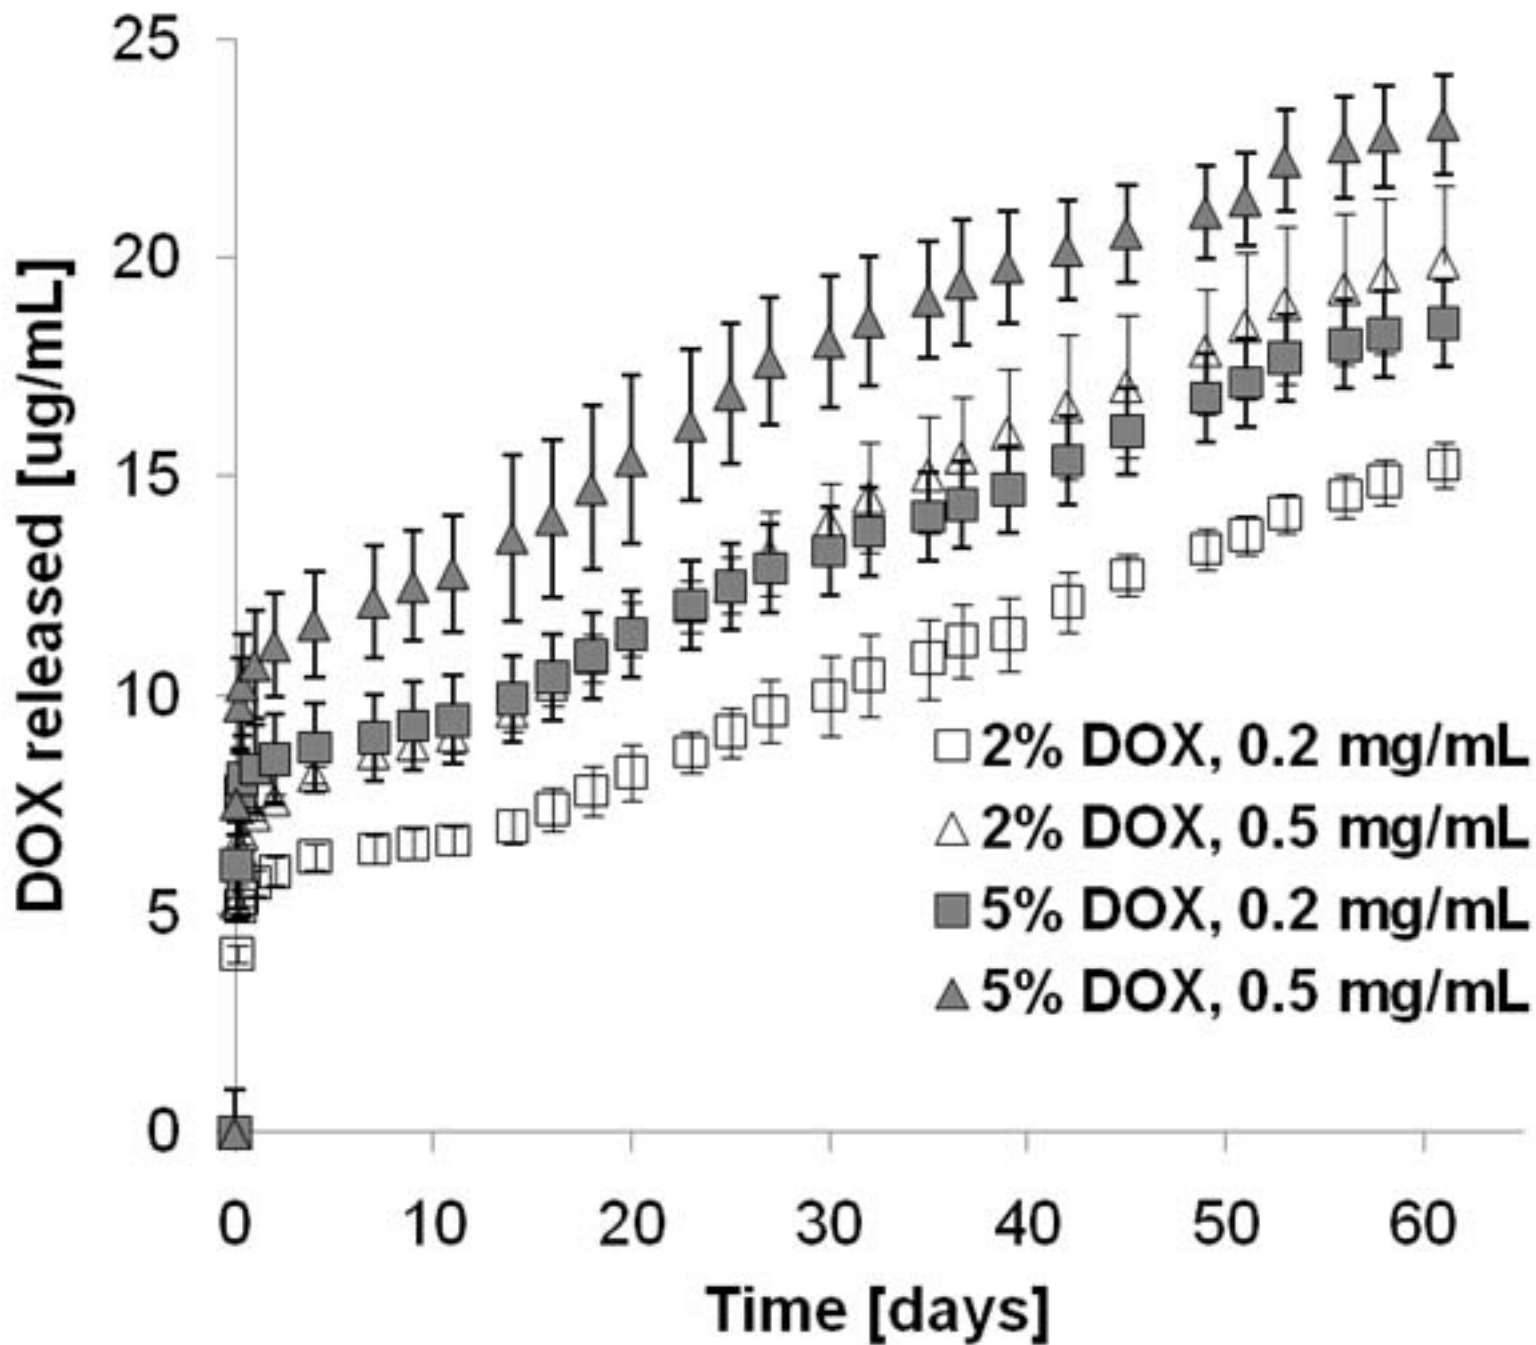

Supplementary Figure 1

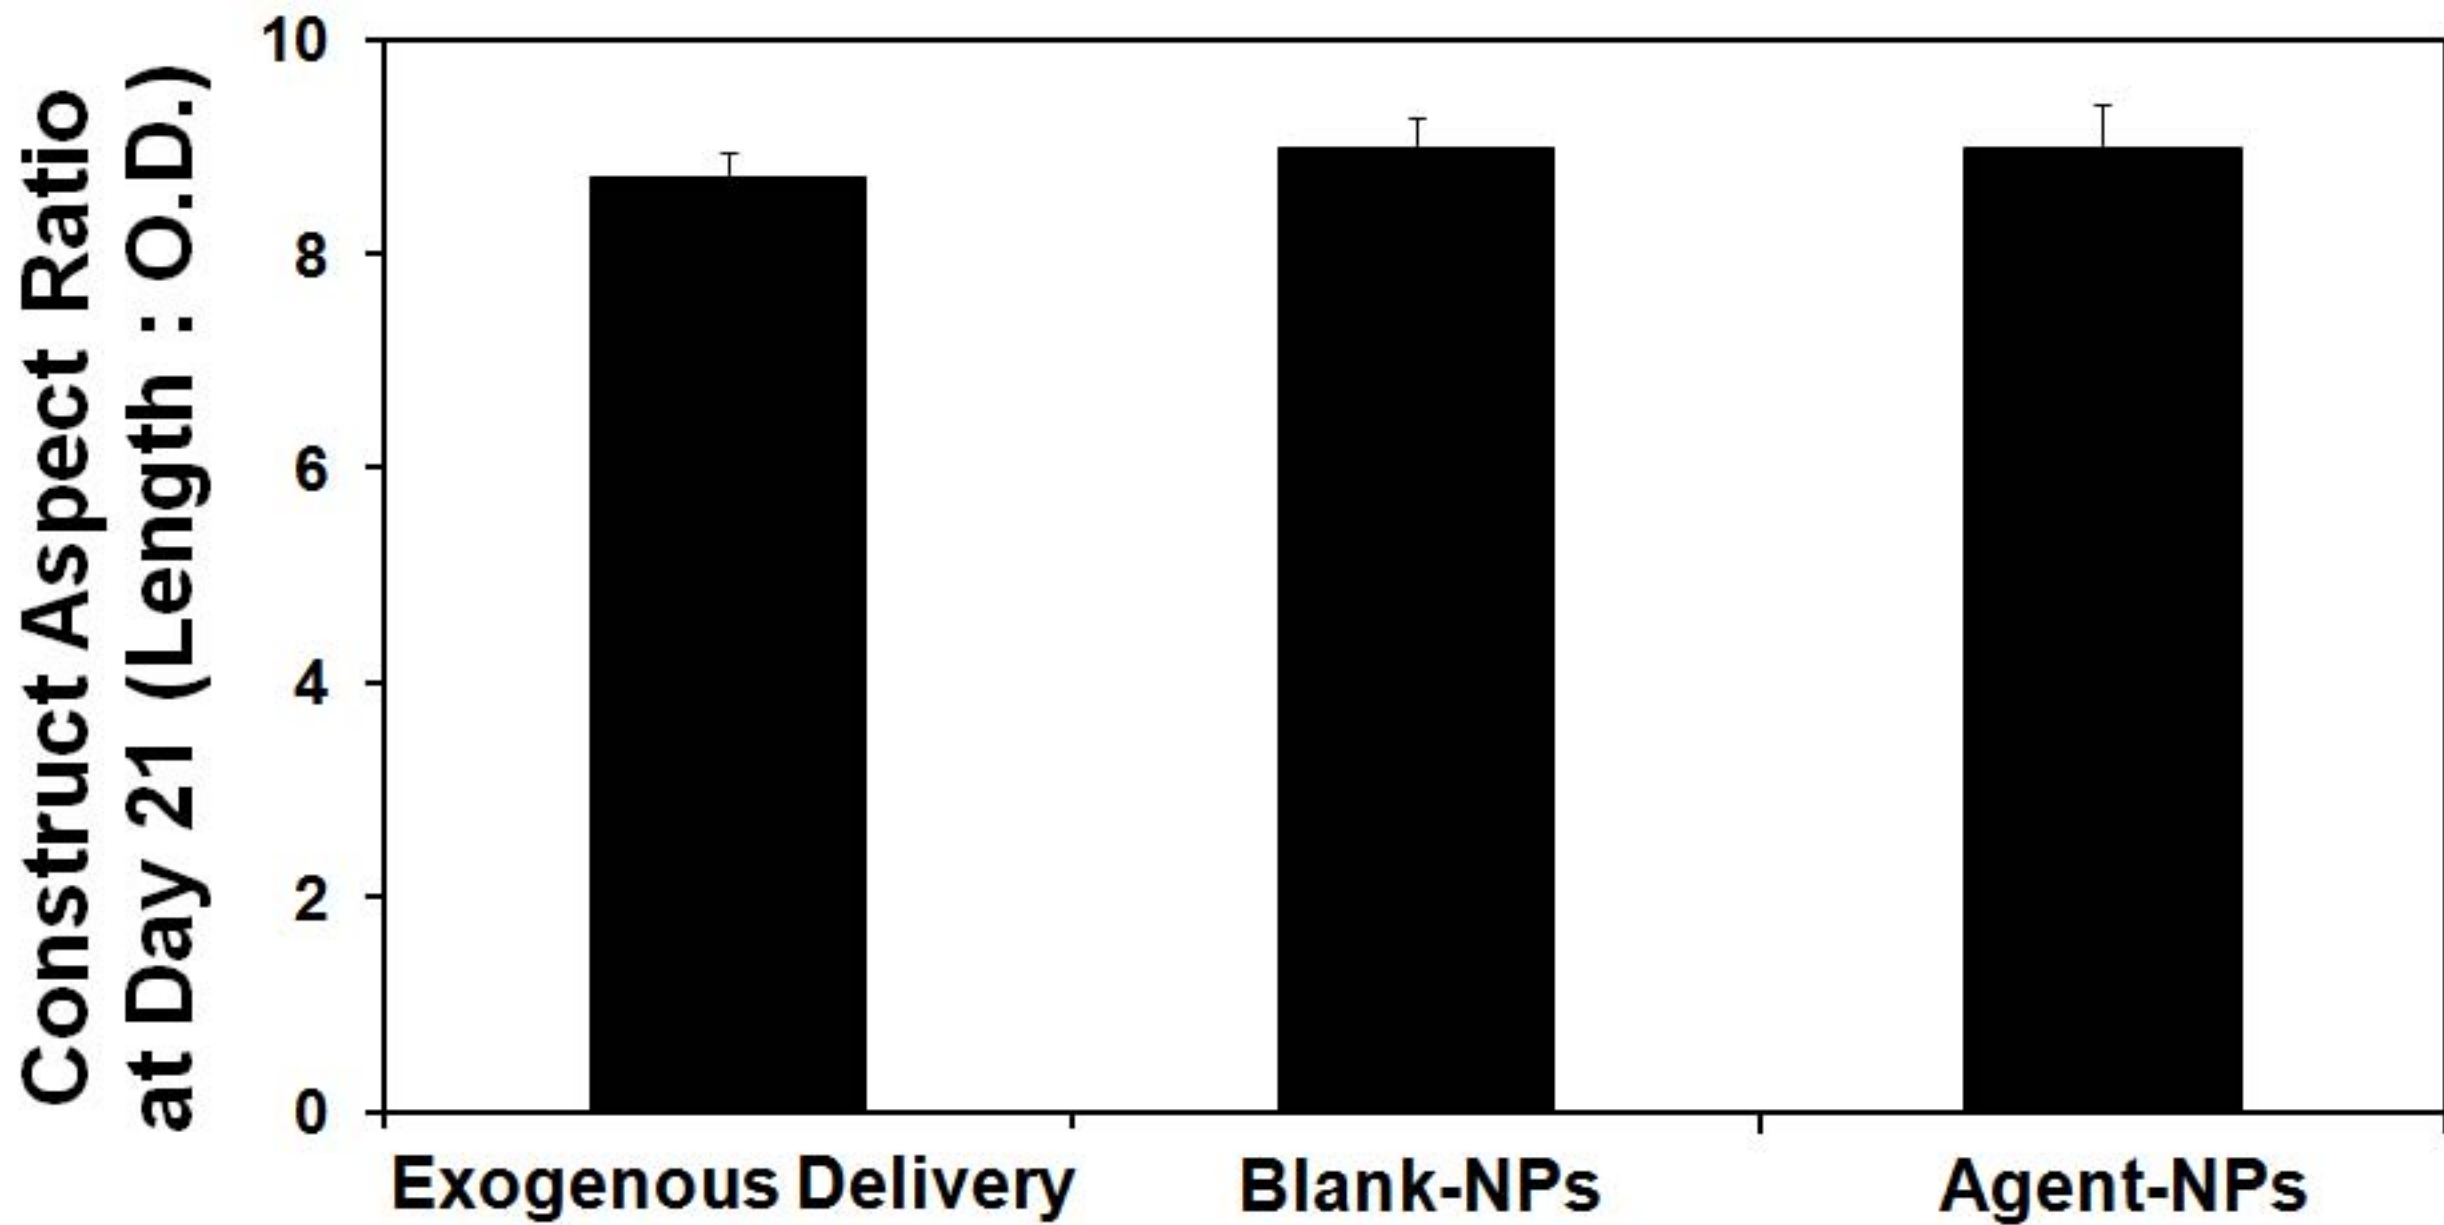

Supplementary Figure 2

# Supplementary Figure 3

TGF- $\beta$ 1 NPs

DOX NPs

No NPs

0.1 mg/mL

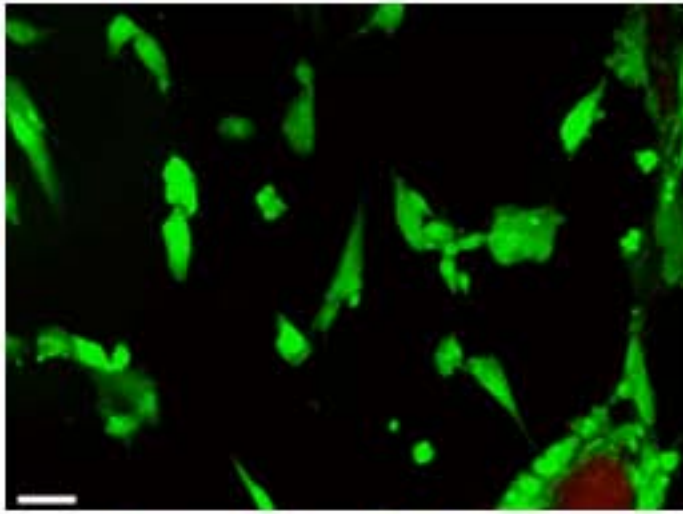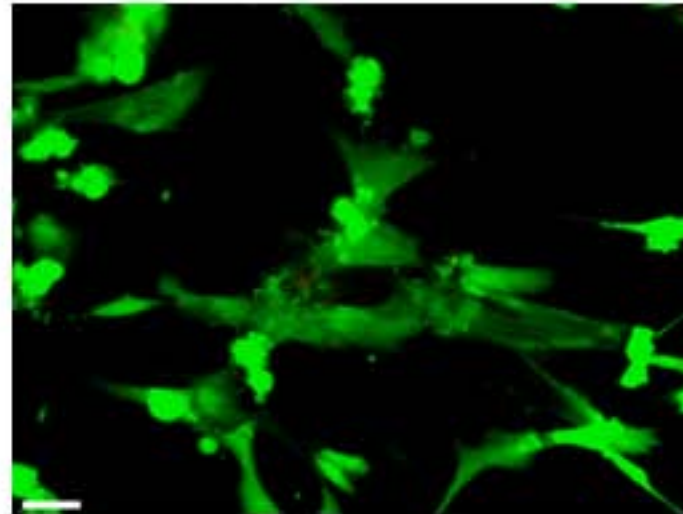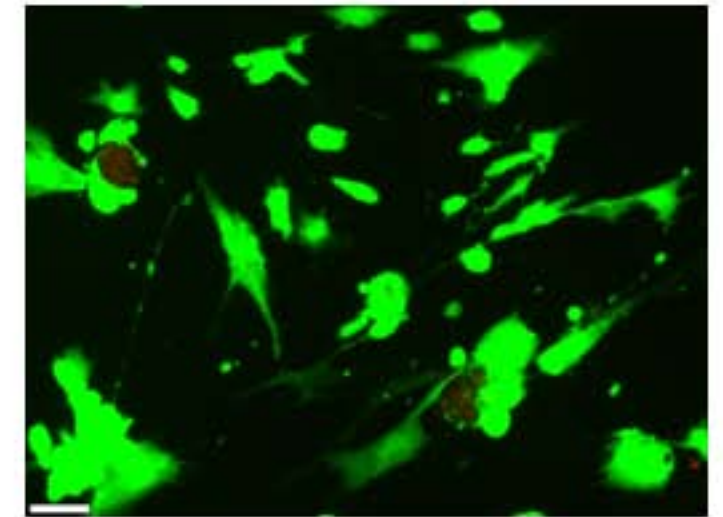

0.2 mg/mL

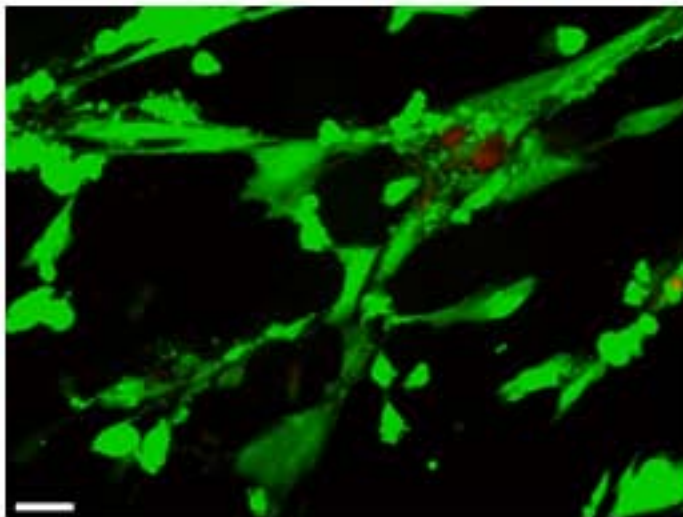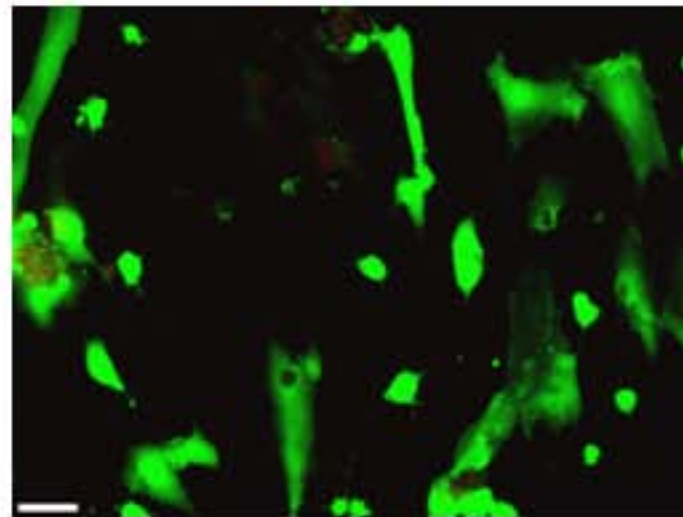

Blank NPs, 0.2 mg/mL

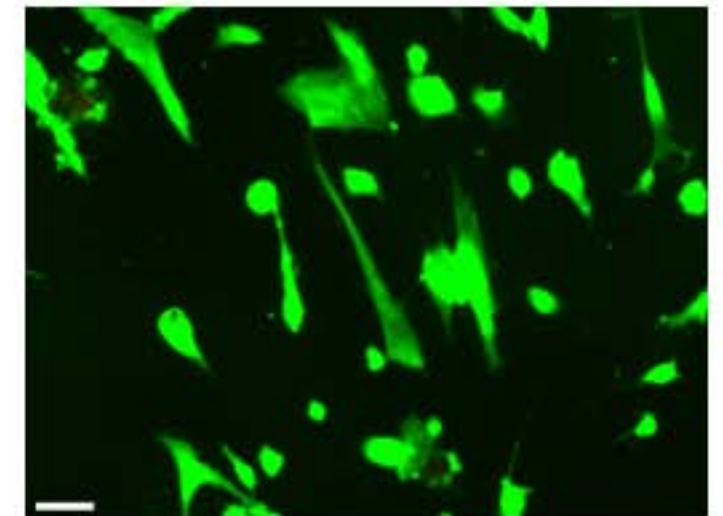

0.5 mg/mL

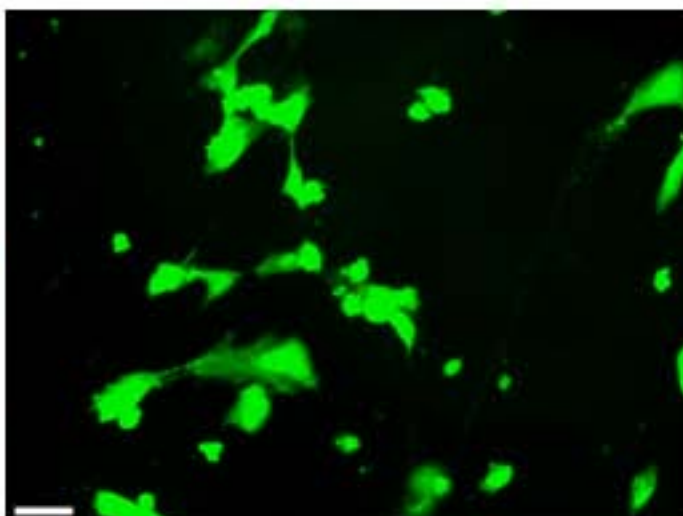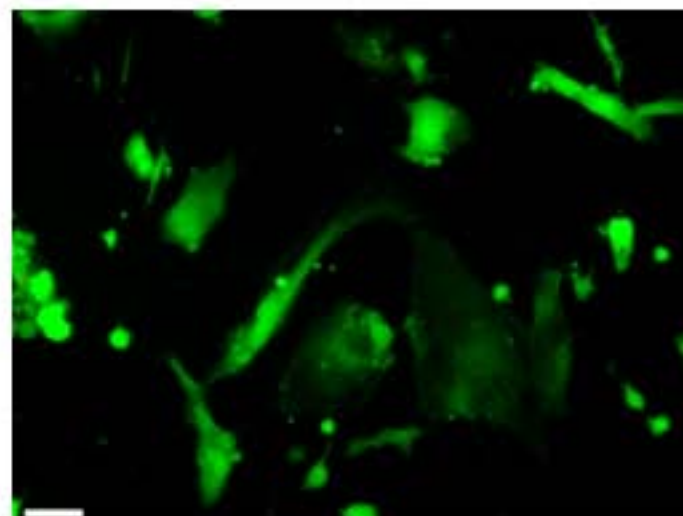

0.3 mg/mL TGF- $\beta$ 1 NPs  
+ 0.2 mg/mL DOX NPs

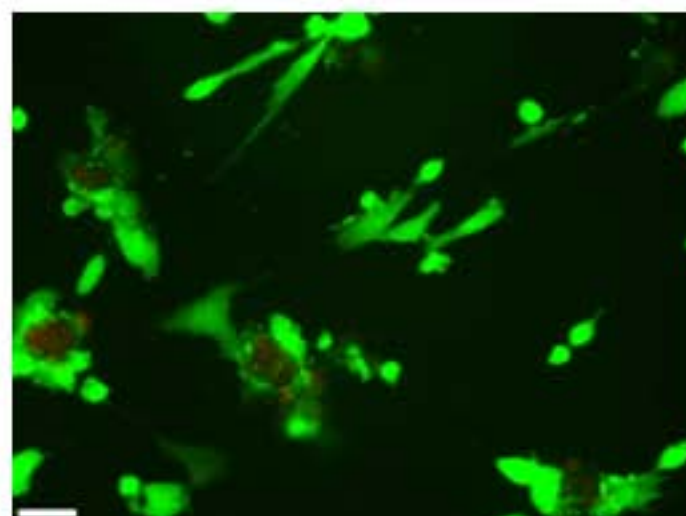



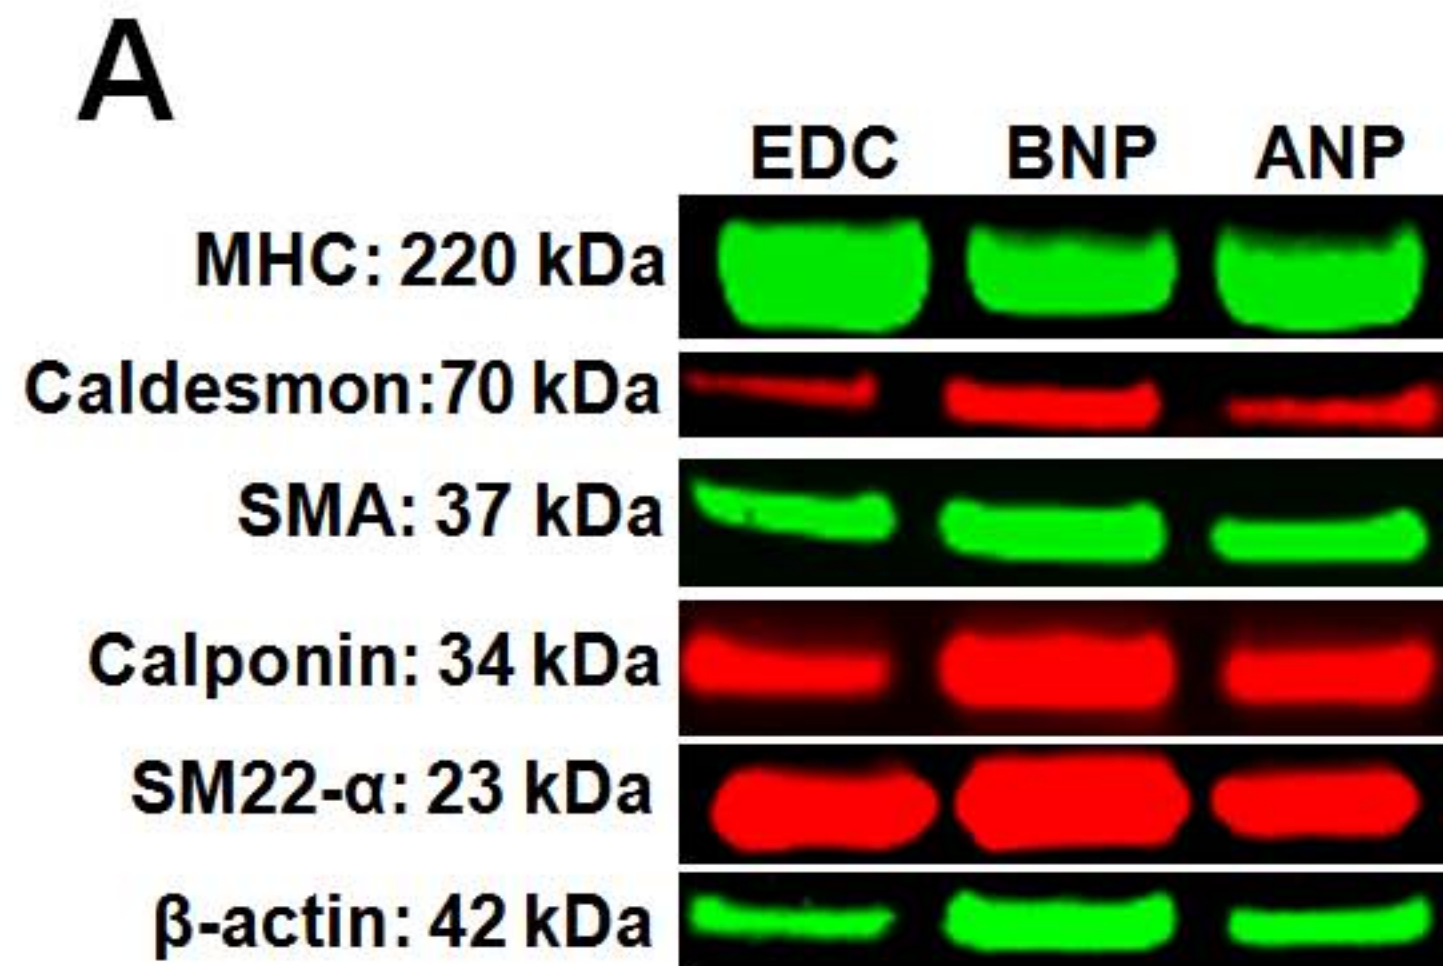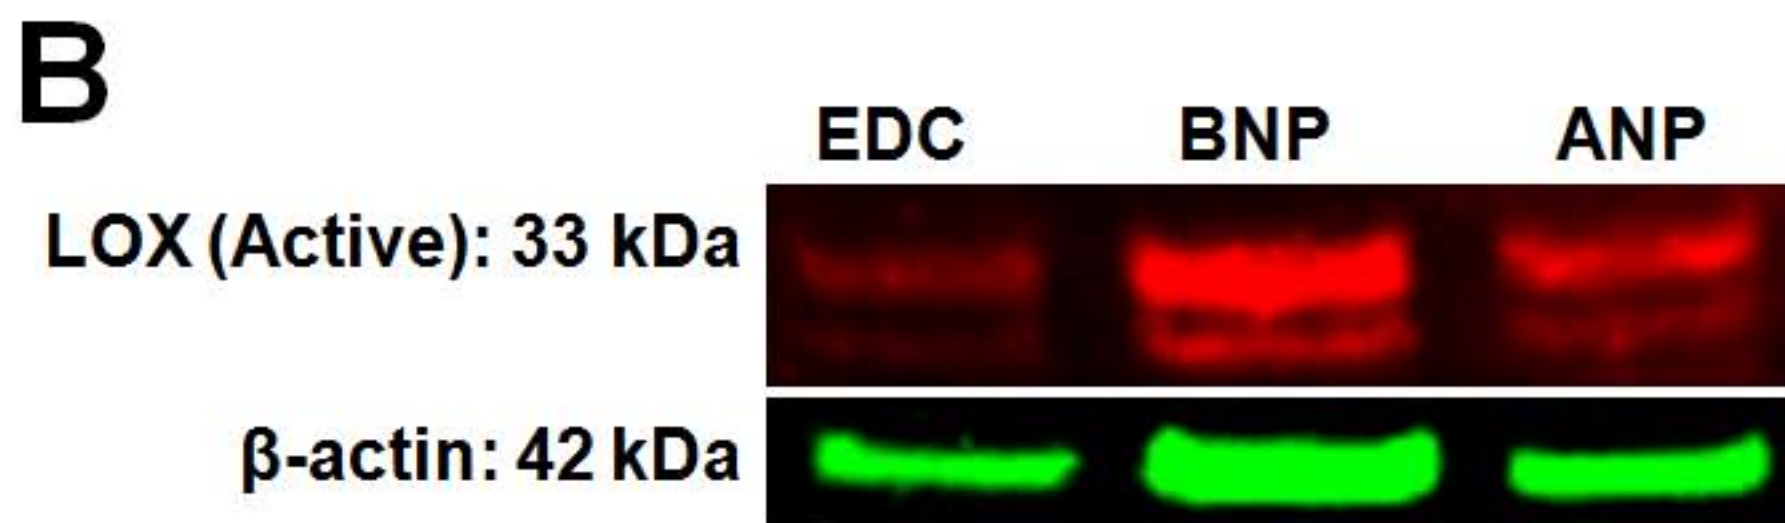

**Supplementary  
Figure 4**
